# Supplementary material
Source: PubMed Central journal article supplement (PMC5673044)
Supplement: ry161697suppa1.pdf [file ry161697suppa1.pdf]

**Table E1. Univariate Analysis of the Associations between CT Features, Clinical Characteristics, and Cytoreductive Outcome in Patients with *BRCA*-mutant HGSOC**

| A: Association between CT Features and Cytoreductive Outcome |          |     |                    |         |          |     |                    |               |
|--------------------------------------------------------------|----------|-----|--------------------|---------|----------|-----|--------------------|---------------|
| CT Features                                                  | Reader 1 |     |                    |         | Reader 2 |     |                    |               |
|                                                              | IR       | CGR | Odds Ratio*        | P Value | IR       | CGR | Odds Ratio*        | P Value       |
| <b>Ovary</b>                                                 |          |     |                    |         |          |     |                    |               |
| Ovarian mass                                                 |          |     | 0.94 (0.05, 16.37) | .965    |          |     | 0.94 (0.05, 16.37) | .965          |
| Present                                                      | 15       | 16  |                    |         | 15       | 16  |                    |               |
| Absent (reference)                                           | 1        | 1   |                    |         | 1        | 1   |                    |               |
| Margins                                                      |          |     | 0.90 (0.21, 3.82)  | .886    |          |     | 0.50 (0.11, 2.31)  | .375          |
| Irregular                                                    | 9        | 10  |                    |         | 9        | 12  |                    |               |
| Smooth (reference)                                           | 6        | 6   |                    |         | 6        | 4   |                    |               |
| Architecture                                                 |          |     | 1.14 (0.28, 4.68)  | .853    |          |     | 0.89 (0.22, 3.67)  | .870          |
| Cystic/predominantly cystic                                  | 8        | 8   |                    |         | 8        | 9   |                    |               |
| Solid/predominantly solid (reference)                        | 7        | 8   |                    |         | 7        | 7   |                    |               |
| Calcifications                                               |          |     | 0.50 (0.04, 6.17)  | .588    |          |     | Non evaluable      | Non evaluable |
| Present                                                      | 1        | 2   |                    |         | 1        | 0   |                    |               |
| Absent (reference)                                           | 14       | 14  |                    |         | 14       | 16  |                    |               |
| <b>Peritoneum</b>                                            |          |     |                    |         |          |     |                    |               |
| Moderate to large ascites                                    |          |     | 1.43 (0.35, 5.79)  | .620    |          |     | 1.11 (0.28, 4.42)  | .881          |
| Present                                                      | 7        | 6   |                    |         | 7        | 7   |                    |               |
| Absent (reference)                                           | 9        | 11  |                    |         | 9        | 10  |                    |               |
| Gallbladder fossa/left intersegmental fissure                |          |     | 1.56 (0.29, 8.38)  | .607    |          |     | 2.50 (0.39, 16.05) | .334          |
| Present                                                      | 4        | 3   |                    |         | 4        | 2   |                    |               |
| Absent (reference)                                           | 12       | 14  |                    |         | 12       | 15  |                    |               |
| Gastrohepatic ligament                                       |          |     | 6.00 (1.22, 29.44) | .027    |          |     | 2.40 (0.57, 10.04) | .231          |
| Present                                                      | 9        | 3   |                    |         | 8        | 5   |                    |               |
| Absent (reference)                                           | 7        | 14  |                    |         | 8        | 12  |                    |               |
| Lesser sac                                                   |          |     | 3.63 (0.74, 17.81) | .112    |          |     | 4.67 (0.96, 22.79) | .057          |
| Present                                                      | 7        | 3   |                    |         | 8        | 3   |                    |               |
| Absent (reference)                                           | 9        | 14  |                    |         | 8        | 14  |                    |               |
| Left upper quadrant                                          |          |     | 3.09 (0.73, 12.98) | .124    |          |     | 1.87 (0.44, 7.85)  | .394          |
| Present                                                      | 9        | 5   |                    |         | 7        | 5   |                    |               |
| Absent (reference)                                           | 7        | 12  |                    |         | 9        | 12  |                    |               |
| PD pattern                                                   |          |     | 0.29 (0.06, 1.45)  | .13     |          |     | 0.17 (0.03, 0.85)  | .031          |
| Nodular                                                      | 8        | 12  |                    |         | 6        | 12  |                    |               |
| Infiltrative (reference)                                     | 7        | 3   |                    |         | 9        | 3   |                    |               |
| <b>Mesentery</b>                                             |          |     |                    |         |          |     |                    |               |
| Mesenteric involvement                                       |          |     | 3.69 (0.34, 39.84) | .282    |          |     | 3.69 (0.34, 39.84) | .281          |

|                             |                   |    |                    |      |         |    |                    |      |
|-----------------------------|-------------------|----|--------------------|------|---------|----|--------------------|------|
| Present                     | 3                 | 1  |                    |      | 3       | 1  |                    |      |
| Absent (reference)          | 13                | 16 |                    |      | 13      | 16 |                    |      |
| Lymphadenopathy             |                   |    |                    |      |         |    |                    |      |
| Periportal                  |                   |    | 5.33 (0.53, 54.03) | .157 |         |    | 5.33 (0.53, 54.03) | .157 |
| Present                     | 4                 | 1  |                    |      | 4       | 1  |                    |      |
| Absent (reference)          | 12                | 16 |                    |      | 12      | 16 |                    |      |
| Supradiaphragmatic          |                   |    | 1.08 (0.18, 6.32)  | .935 |         |    | 1.08 (0.18, 6.32)  | .935 |
| Present                     | 3                 | 3  |                    |      | 3       | 3  |                    |      |
| Absent (reference)          | 13                | 14 |                    |      | 13      | 14 |                    |      |
| Suprarenal para-aortic      |                   |    | 1.56 (0.29, 8.38)  | .607 |         |    | 2.80 (0.56, 13.95) | .209 |
| Present                     | 4                 | 3  |                    |      | 6       | 3  |                    |      |
| Absent (reference)          | 12                | 14 |                    |      | 10      | 14 |                    |      |
| B: Clinical characteristics |                   |    |                    |      |         |    |                    |      |
|                             | Odds Ratio*       |    |                    |      | P Value |    |                    |      |
| Age at diagnosis (y)        | 0.99 (0.93, 1.06) |    |                    |      | >.99    |    |                    |      |
| CA-125 level (U/mL)         | 1.00 (1.00, 1.00) |    |                    |      | .54     |    |                    |      |

Note.—CGR = complete cytoreduction or complete gross resection, IR = incomplete cytoreduction or incomplete resection.

\* Data in parentheses are the 95% CIs.

**Table E2. Univariate Analysis of the Associations between CT Features, Clinical Characteristics, and Cytoreductive Outcome in Patients with *BRCA* Wild-type HGSOC**

| A: Association between CT Features and Cytoreductive Outcome |          |     |                    |         |          |     |                    |         |
|--------------------------------------------------------------|----------|-----|--------------------|---------|----------|-----|--------------------|---------|
| CT Features                                                  | Reader 1 |     |                    |         | Reader 2 |     |                    |         |
|                                                              | IR       | CGR | Odds Ratio*        | P Value | IR       | CGR | Odds Ratio*        | P Value |
| Ovary                                                        |          |     |                    |         |          |     |                    |         |
| Ovarian Mass                                                 |          |     | 0.92 (0.26, 3.23)  | .898    |          |     | 0.92 (0.26, 3.23)  | .898    |
| Present                                                      | 25       | 38  |                    |         | 25       | 38  |                    |         |
| Absent (reference)                                           | 5        | 7   |                    |         | 5        | 7   |                    |         |
| Margins                                                      |          |     | 0.86 (0.29, 2.59)  | .796    |          |     | 0.98 (0.30, 3.21)  | .977    |
| Irregular                                                    | 17       | 27  |                    |         | 19       | 29  |                    |         |
| Smooth (reference)                                           | 8        | 11  |                    |         | 6        | 9   |                    |         |
| Architecture                                                 |          |     | 1.03 (0.37, 2.85)  | .954    |          |     | 0.82 (0.28, 2.38)  | .716    |
| Cystic/predominantly cystic                                  | 14       | 21  |                    |         | 16       | 26  |                    |         |
| Solid/predominantly solid (reference)                        | 11       | 17  |                    |         | 9        | 12  |                    |         |
| Calcifications                                               |          |     | 1.56 (0.21, 11.90) | .665    |          |     | 1.56 (0.21, 11.90) | .665    |
| Present                                                      | 2        | 2   |                    |         | 2        | 2   |                    |         |
| Absent (reference)                                           | 23       | 36  |                    |         | 23       | 36  |                    |         |
| Peritoneum                                                   |          |     |                    |         |          |     |                    |         |
| Moderate to large ascites                                    |          |     | 3.06 (1.10, 8.54)  | .033    |          |     | 2.70 (1.01, 7.27)  | .048    |
| Present                                                      | 13       | 9   |                    |         | 14       | 11  |                    |         |
| Absent (reference)                                           | 17       | 36  |                    |         | 16       | 34  |                    |         |
| Gallbladder fossa/left intersegmental fissure                |          |     | 5.12 (1.43, 18.37) | .012    |          |     | 6.83 (1.94, 24.09) | .003    |

|                             |                   |    |                     |       |         |    |                      |       |
|-----------------------------|-------------------|----|---------------------|-------|---------|----|----------------------|-------|
| Present                     | 10                | 4  |                     |       | 12      | 4  |                      |       |
| Absent (reference)          | 20                | 41 |                     |       | 18      | 41 |                      |       |
| Gastrohepatic ligament      |                   |    | 1.09 (0.31, 3.80)   | .898  |         |    | 1.16 (0.36, 3.75)    | .809  |
| Present                     | 5                 | 7  |                     |       | 6       | 8  |                      |       |
| Absent (reference)          | 25                | 38 |                     |       | 24      | 37 |                      |       |
| Lesser sac                  |                   |    | 16.43 (3.35, 80.66) | <.001 |         |    | 21.50 (4.39, 105.24) | <.001 |
| Present                     | 13                | 2  |                     |       | 15      | 2  |                      |       |
| Absent (reference)          | 17                | 43 |                     |       | 15      | 43 |                      |       |
| Left upper quadrant         |                   |    | 7.00 (2.49, 19.70)  | <.001 |         |    | 5.25 (1.91, 14.47)   | .001  |
| Present                     | 20                | 10 |                     |       | 18      | 10 |                      |       |
| Absent (reference)          | 10                | 35 |                     |       | 12      | 35 |                      |       |
| PD pattern                  |                   |    | 1.19 (0.44, 3.23)   | .729  |         |    | 0.75 (0.24, 2.31)    | .616  |
| Nodular                     | 10                | 13 |                     |       | 6       | 11 |                      |       |
| Infiltrative (reference)    | 20                | 31 |                     |       | 24      | 33 |                      |       |
| Mesentery                   |                   |    |                     |       |         |    |                      |       |
| Mesenteric involvement      |                   |    | 5.96 (2.10, 16.90]  | <.001 |         |    | 6.84 (2.22, 21.13)   | <.001 |
| Present                     | 23                | 16 |                     |       | 25      | 19 |                      |       |
| Absent (reference)          | 7                 | 29 |                     |       | 5       | 26 |                      |       |
| Lymphadenopathy             |                   |    |                     |       |         |    |                      |       |
| Periportal                  |                   |    | 2.00 (0.55–7.27)    | .292  |         |    | 1.16 (0.36, 3.75]    | .809  |
| Present                     | 6                 | 5  |                     |       | 6       | 8  |                      |       |
| Absent (reference)          | 24                | 40 |                     |       | 24      | 37 |                      |       |
| Supradiaphragmatic          |                   |    | 7.56 (2.66, 21.50)  | <.001 |         |    | 5.50 (1.98, 15.24)   | .001  |
| Present                     | 22                | 12 |                     |       | 22      | 15 |                      |       |
| Absent (reference)          | 8                 | 33 |                     |       | 8       | 30 |                      |       |
| Suprarenal para-aortic      |                   |    | 6.00 (1.47, 24.52)  | .013  |         |    | 8.11 (2.03, 32.44)   | .003  |
| Present                     | 9                 | 3  |                     |       | 11      | 3  |                      |       |
| Absent (reference)          | 21                | 42 |                     |       | 19      | 42 |                      |       |
| B: Clinical characteristics |                   |    |                     |       |         |    |                      |       |
|                             | Odds Ratio*       |    |                     |       | P Value |    |                      |       |
| Age at diagnosis (y)        | 1.01 (0.96, 1.06) |    |                     |       | .92     |    |                      |       |
| CA-125 level (U/mL)         | 1.00 (1.00, 1.00) |    |                     |       | .98     |    |                      |       |

Note.—CGR = complete cytoreduction or complete gross resection, IR = incomplete cytoreduction or incomplete resection.

\* Data in parentheses are the 95% CIs.

**Table E3. Multiple Regression of the Associations between CT Features and Cytoreductive Outcome (Incomplete Cytoreduction) in Patients with BRCA Wild-type HGSO**

| CT Feature                             | Odds Ratio*        | P Value |
|----------------------------------------|--------------------|---------|
| Mesenteric involvement                 | 7.10 (3.39, 14.85) | <.001   |
| PD in lesser sac                       | 2.40 (1.48, 3.90)  | <.001   |
| PD in left upper quadrant              | 1.19 (1.11, 1.28)  | <.001   |
| Supradiaphragmatic lymphadenopathy     | 2.83 (2.03, 3.95)  | <.001   |
| Suprarenal para-aortic lymphadenopathy | 4.79 (3.65, 6.27)  | <.001   |

\* Data in parentheses are the 95% CIs.

**Table E4. Univariate Analysis of the Associations between CT Features, Clinical Characteristics, and PFS in Patients with BRCA-mutant HGSOC**

| A: Association between CT Features and PFS    |                           |         |                      |         |
|-----------------------------------------------|---------------------------|---------|----------------------|---------|
| CT Feature Present                            | Reader 1                  |         | Reader 2             |         |
|                                               | Hazard Ratio*             | P Value | Hazard Ratio*        | P Value |
| <b>Ovary</b>                                  |                           |         |                      |         |
| Ovarian mass                                  | 1.83 (0.25, 13.56)        | .554    | 1.83 (0.25, 13.56)   | .554    |
| Irregular margins                             | 0.67 (0.29, 1.53)         | .343    | 1.03 (0.42, 2.48)    | .953    |
| Solid/predominantly solid architecture        | 1.19 (0.53, 2.67)         | .665    | 1.27 (0.56, 2.88)    | .562    |
| Calcifications                                | 1.44 (0.42, 4.95)         | .560    | 1.95 (0.25, 15.06)   | .520    |
| <b>Peritoneum</b>                             |                           |         |                      |         |
| Moderate to large ascites                     | 1.28 (0.57, 2.85)         | .551    | 1.01 (0.45, 2.25)    | .985    |
| Gallbladder fossa/left intersegmental fissure | 0.94 (0.35, 2.51)         | .902    | 0.76 (0.26, 2.21)    | .611    |
| Gastrohepatic ligament                        | 2.01 (0.89, 4.53)         | .092    | 1.57 (0.70, 3.52)    | .272    |
| Lesser sac                                    | 0.66 (0.28, 1.53)         | .329    | 0.60 (0.26, 1.36)    | .220    |
| Left upper quadrant                           | 0.84 (0.37, 1.87)         | .663    | 1.10 (0.49, 2.50)    | .814    |
| Infiltrative PD pattern                       | 1.28 (0.55, 2.98)         | .564    | 0.94 (0.42, 2.09)    | .870    |
| <b>Mesentery</b>                              |                           |         |                      |         |
| Mesenteric involvement                        | 24.46 (5.22, 114.69)      | <.001   | 24.46 (5.22, 114.69) | <.001   |
| <b>Lymphadenopathy</b>                        |                           |         |                      |         |
| Periportal                                    | 4.07 (1.48, 11.20)        | .007    | 4.07 (1.48, 11.20)   | .007    |
| Supradiaphragmatic                            | 3.14 (1.13, 8.72)         | .028    | 3.14 (1.13, 8.72)    | .028    |
| Suprarenal para-aortic                        | 1.77 (0.70, 4.48)         | .226    | 2.58 (1.10, 6.06)    | .029    |
| <b>B: Clinical characteristics</b>            |                           |         |                      |         |
|                                               | Hazard Ratio*             |         | P Value              |         |
| Age at diagnosis (y)                          | 1.01 (0.98, 1.05)         |         | .435                 |         |
| CA-125 level (U/mL)                           | 1.0003 (1.00004, 1.00048) |         | .021                 |         |

\* Data in parentheses are the 95% CIs.

**Table E5. Univariate Analysis of the Associations between CT Features, Clinical Characteristics, and PFS in Patients with BRCA Wild-type HGSOC**

| A: Association between CT Features and PFS    |                   |         |                   |         |
|-----------------------------------------------|-------------------|---------|-------------------|---------|
| CT Feature Present                            | Reader 1          |         | Reader 2          |         |
|                                               | Hazard Ratio*     | P Value | Hazard Ratio*     | P Value |
| <b>Ovary</b>                                  |                   |         |                   |         |
| Ovarian mass                                  | 0.88 (0.46, 1.69) | .709    | 0.88 (0.46, 1.69) | .709    |
| Irregular margins                             | 1.44 (0.78, 2.66) | .240    | 1.02 (0.53, 1.95) | .959    |
| Solid/predominantly solid architecture        | 1.57 (0.90, 2.73) | .112    | 1.63 (0.89, 2.99) | .111    |
| Calcifications                                | 2.29 (0.81, 6.49) | .119    | 2.47 (0.87, 7.03) | .091    |
| <b>Peritoneum</b>                             |                   |         |                   |         |
| Moderate to large ascites                     | 1.24 (0.74, 2.10) | .415    | 1.11 (0.67, 1.86) | .680    |
| Gallbladder fossa/left intersegmental fissure | 1.45 (0.78, 2.68) | .240    | 1.21 (0.67, 2.19) | .531    |
| Gastrohepatic ligament                        | 1.03 (0.54, 1.99) | .920    | 1.03 (0.56, 1.90) | .933    |
| Lesser sac                                    | 0.87 (0.47, 1.61) | .668    | 0.83 (0.46, 1.48) | .521    |
| Left upper quadrant                           | 1.63 (0.98, 2.71) | .060    | 1.50 (0.90, 2.51) | .119    |

|                             |                   |       |                   |       |
|-----------------------------|-------------------|-------|-------------------|-------|
| Infiltrative PD pattern     | 1.58 (0.94, 2.65) | .081  | 1.14 (0.79, 1.59) | .650  |
| Mesentery                   |                   |       |                   |       |
| Mesenteric involvement      | 2.42 (1.45, 4.02) | <.001 | 2.61 (1.54, 4.42) | <.001 |
| Lymphadenopathy             |                   |       |                   |       |
| Periportal                  | 1.48 (0.76, 2.89) | .254  | 1.23 (0.66, 2.30) | .519  |
| Supradiaphragmatic          | 1.31 (0.80, 2.14) | .281  | 1.29 (0.79, 2.10) | .306  |
| Suprarenal para-aortic      | 1.20 (0.63, 2.31) | .581  | 1.35 (0.73, 2.49) | .335  |
| B: Clinical characteristics |                   |       |                   |       |
|                             | Hazard Ratio*     |       | P Value           |       |
| Age at diagnosis (y)        | 1.00 (0.98, 1.03) |       | .983              |       |
| CA-125 level (U/mL)         | 1.00 (1.00, 1.00) |       | .343              |       |

\* Data in parentheses are the 95% CIs.
